# Supplementary material for: Biosynthesis of Ag Nanoparticles Using Caralluma acutangula Extract and Its Catalytic Functionality towards Degradation of Hazardous Dye Pollutants
Source: MDPI journal article supplement (doi:10.3390/cryst12081069), 2022-07-30
Supplement: s1 [file s1]

Supporting Information

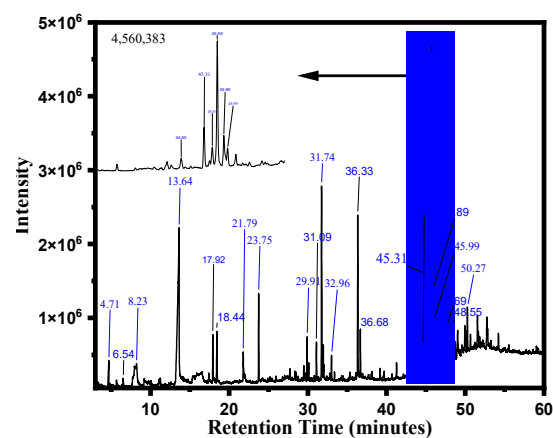

**Figure S1.** Gas Chromatography-Mass Spectrometry chromatogram of *Caralluma acutangula* extract in methanol. Inset Figure refers to zoom of the blue color zone. Identified predominant components in the extract are shown in Table S1.

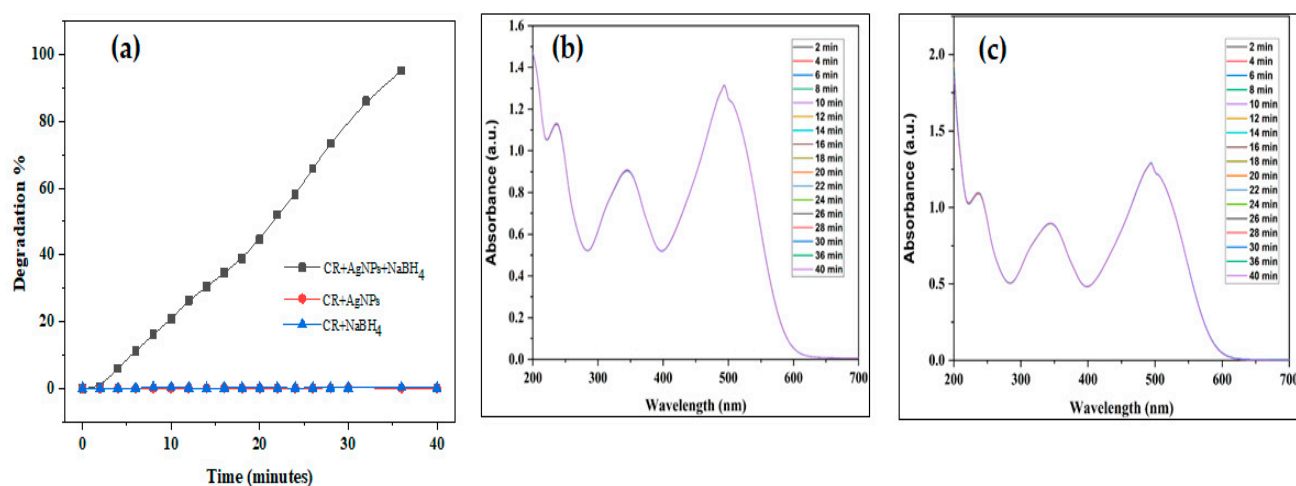

**Figure S2.** (a) CR dye degradation by CA-AgNPs with NaBH<sub>4</sub>, NaBH<sub>4</sub>, CA-AgNPs alone (b) Control UV graph of CR with NaBH<sub>4</sub> alone; (c) Control UV graph of MB with CA-AgNPs alone.

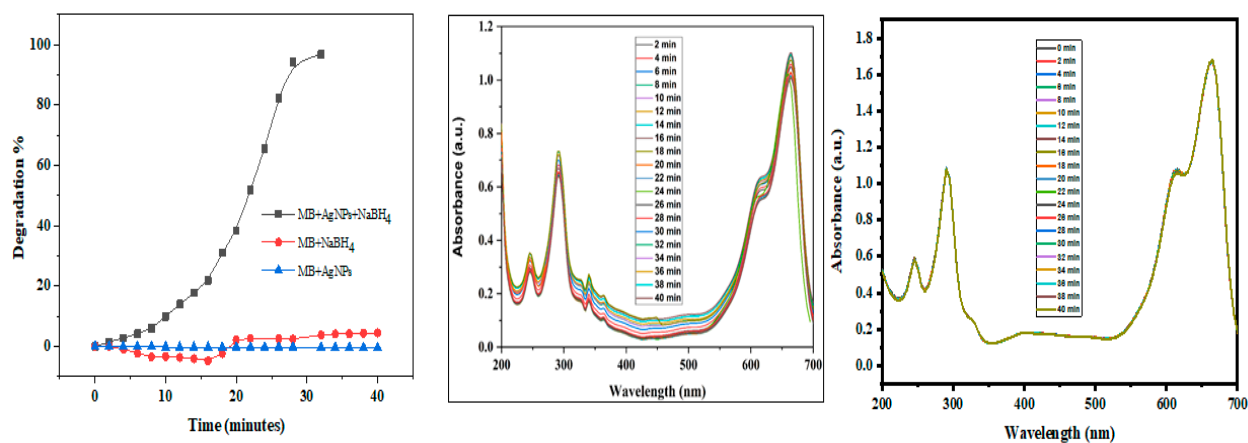

**Figure S3.** (a) MB dye degradation by CA-AgNPs with NaBH<sub>4</sub>, NaBH<sub>4</sub>, CA-AgNPs alone (b) UV graph of MB Control with NaBH<sub>4</sub> alone; (c) UV graph of MB Control with CA-AgNPs alone.

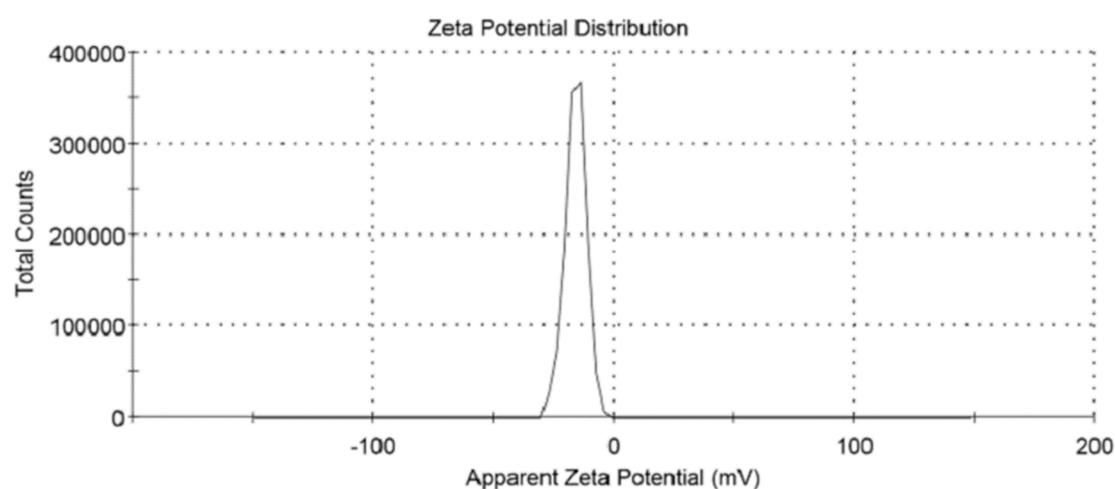

**Figure S4.** Zeta Potential analysis of CA-AgNPs.

**Table S1.** List of phytochemicals identified in aqueous extract of CAE by Gas Chromatography-Mass spectrometry (GC-MS) along with their retention times, and peak area%, similarity index and molecular weight.

| R. Peak | Peak Time (min) | area  | S.I. % | Name of Phytochemical from CA                                                                           | Molecular weight (g/mol) |
|---------|-----------------|-------|--------|---------------------------------------------------------------------------------------------------------|--------------------------|
| 1       | 4.71            | 1.84  | 88     | Isovaleric acid                                                                                         | 102                      |
| 2       | 6.54            | 0.30  | 93     | 1,2-Cyclopentanedione                                                                                   | 98                       |
| 3       | 8.23            | 8.22  | 92     | Glycerin                                                                                                | 92                       |
| 4       | 13.64           | 27.80 | 98     | Benzoic acid                                                                                            | 122                      |
| 5       | 17.92           | 2.26  | 83     | 1,3,5-Pentanetriol, 3-methyl                                                                            | 134                      |
| 6       | 18.44           | 2.88  | 80     | Glycerol trimethyl ether                                                                                | 134                      |
| 7       | 21.79           | 0.68  | 81     | 3-Furanacetic acid, 4-hexyl-2,5-dihydro-2,5-dioxo-                                                      | 240                      |
| 8       | 23.75           | 3.20  | 82     | 3',5'-Dimethoxyacetophenone                                                                             | 180                      |
| 9       | 29.91           | 1.60  | 79     | 2'-deoxy-3-methyl-3',5'-di-O-methyl- Uridine                                                            | 270                      |
| 10      | 31.09           | 1.75  | 76     | 4-(1,3,3-trimethyl-7-oxabicyclo[4.1.0]hept-2-yl)- 2-Pentanone                                           | 224                      |
| 11      | 31.74           | 10.16 | 72     | Tridecanoic acid, 4,8,12-trimethyl-, methyl ester                                                       | 270                      |
| 12      | 31.96           | 1.23  | 75     | 2-Methyl-2-hexenoic acid                                                                                | 128                      |
| 13      | 32.03           | 0.55  | 90     | L-(+)-Ascorbic acid 2,6-dihexadecanoate                                                                 | 652                      |
| 14      | 36.33           | 6.49  | 71     | (2S,13S)-12,13-Dihydroxy-1,4,7,10-tetraoxacyclotetradecane                                              | 236                      |
| 15      | 36.67           | 2.33  | 71     | 6-O-Methyl-2,4-methylene-.beta.-sedoheptitol                                                            | 238                      |
| 16      | 44.65           | 1.13  | 66     | Androst-5,15-dien-3-ol acetate                                                                          | 314                      |
| 17      | 45.31           | 3.78  | 69     | K-Strophanthin                                                                                          | 710                      |
| 18      | 45.47           | 0.43  | 68     | Cymarin                                                                                                 | 548                      |
| 19      | 45.55           | 1.95  | 68     | 11- $\alpha$ -Hydroxy-7-oxodiosgenin                                                                    | 444                      |
| 20      | 45.69           | 11.77 | 70     | D-Arabin-Hexopyranoside, methyl 2,6-dideoxy-4-O-(6-deoxy-3-O-methyl-.beta.-D-allopyranosyl)-3-O-methyl- | 336                      |
| 21      | 45.89           | 3.65  | 71     | 2H-Pyran, 6-heptyltetrahydro-2,2-dimethoxy-                                                             | 244                      |

---

|    |       |      |    |                                                                                     |     |
|----|-------|------|----|-------------------------------------------------------------------------------------|-----|
| 22 | 45.99 | 1.69 | 77 | Uridine, 2'-deoxy-3-methyl-3',5'-di-O-methyl-                                       | 270 |
| 23 | 47.69 | 1.32 | 66 | 1-Heptatriacotanol                                                                  | 536 |
| 24 | 48.55 | 1.21 | 72 | Methyl eicosa-5,8,11,13-tetraenoate, adduct with 1-methyl-1,3,4-triazolin-2,5-dione | 431 |
| 25 | 50.27 | 1.86 | 65 | 2,5-Furandione, 3-dodecenyl-                                                        | 266 |

---
